# Supplementary material for: Nutritional Value of Duckweed as Protein Feed for Broiler Chickens—Digestibility of Crude Protein, Amino Acids and Phosphorus
Source: MDPI journal article supplement (doi:10.3390/ani13010130), 2022-12-29
Supplement: s1 [file s1]

**Table S2.** Fiber composition and amino acid profile of dried duckweed (g/kg as fed except where stated)

| Batch                   | A                                           | B                          | C                    |
|-------------------------|---------------------------------------------|----------------------------|----------------------|
| Species                 | <i>Lemna minuta</i> ,<br><i>Lemna minor</i> | <i>Spirodela polyrhiza</i> | <i>Lemna obscura</i> |
| Dry matter              | 953                                         | 897                        | 934                  |
| Crude fiber             | 124                                         | 109                        | 123                  |
| Neutral detergent fiber | 421                                         | 275                        | 294                  |
| Acid detergent fiber    | 200                                         | 234                        | 186                  |
| Acid detergent lignin   | 30.5                                        | 56.5                       | 29.0                 |
| Crude protein           | 175                                         | 246                        | 370                  |
| Methionine              | 2.26                                        | 3.26                       | 7.42                 |
| Cysteine                | 1.63                                        | 2.45                       | 4.06                 |
| Lysine                  | 6.88                                        | 10.20                      | 22.87                |
| Threonine               | 6.14                                        | 8.76                       | 15.88                |
| Tryptophan              | 2.45                                        | 3.47                       | 7.54                 |
| Arginine                | 7.58                                        | 12.97                      | 22.98                |
| Isoleucine              | 6.23                                        | 8.46                       | 17.05                |
| Leucine                 | 10.94                                       | 15.31                      | 31.67                |
| Valine                  | 7.50                                        | 11.33                      | 21.24                |
| Histidine               | 2.33                                        | 3.49                       | 7.78                 |
| Phenylalanine           | 7.08                                        | 9.76                       | 19.85                |
| Glycine                 | 7.90                                        | 10.55                      | 19.51                |
| Serine                  | 6.29                                        | 8.78                       | 16.07                |
| Proline                 | 6.48                                        | 8.87                       | 16.90                |
| Alanine                 | 8.57                                        | 12.40                      | 21.70                |
| Asparagine              | 14.51                                       | 26.44                      | 32.41                |
| Glutamine               | 14.90                                       | 22.73                      | 37.74                |
