# Supplementary material for: Nutritional Value of Duckweed as Protein Feed for Broiler Chickens—Digestibility of Crude Protein, Amino Acids and Phosphorus
Source: MDPI journal article supplement (doi:10.3390/ani13010130), 2022-12-29
Supplement: s1 [file s1]

**Table S1.** Botanical composition of the basal diet

| Ingredients (g/kg)              | Basal diet |
|---------------------------------|------------|
| Maize                           | 433.5      |
| Wheat                           | 150.0      |
| Soybean meal (46 % CP)          | 261.0      |
| Rapeseed meal                   | 60.0       |
| Vegetable oil (non GMO)         | 59.5       |
| Limestone (CaCO <sub>3</sub> )  | 12.3       |
| L-Lysine (78%)                  | 3.0        |
| L-Threonine                     | 0.9        |
| L-Methionine                    | 2.6        |
| Mono-calcium-phosphate (MCP)    | 9.0        |
| Salt (NaHCO <sub>3</sub> +NaCl) | 3.0        |
| Premix (Vit./Min.) <sup>1</sup> | 5.2        |

<sup>1</sup> feed additives per kg as fed: vitamin A (3a672a) 10000 IU, vitamin D3 (3a671) 4000 IU, vitamin E (all-rac-alpha-tocopherylacetate) (3a700) 38 IU, selenium (3b801, Na-selenite) 0.34 mg, copper (3b405, Cu(II)-sulfate, pentahydrate) 6.5 mg, copper (3b4.10, Cu-chelate of methionine hydroxy-analogue) 8.3 mg, zinc (3b603, Zn-oxide) 31.2 mg, zinc (3b6.10, Zn-chelate of methionine hydroxy-analogue) 34.6 mg, manganese (3b502, Mn-(II)-oxide) 20.8 mg, manganese (3b5.10, Mn-chelate of methionine hydroxy-analogue) 34.6 mg, iron (3b103, Fe-(II)-sulfate, monohydrate) 76.6 mg, iodine (3b202, Ca-iodate) 1.1 mg, calcium salt of methionine hydroxy-analogue 2.23 g, 6-Phytase EC 3.1.3.26 (Quantum Blue) (4a19) 260 FTU, Endo-1,4-Beta-Xylanase EC 3.2.1.8 (4a15) 610 U, Endo 1,3 (4)-β-Glucanase EC 3.2.1.6 (4a15) 76 U, Butylated hydroxytoluene (E321) 60.8 mg, sepiolite (E 562) 0.3 mg
